# Supplementary material
Source: PubMed Central journal article supplement (PMC1421361)
Supplement: JCI0627352sd.pdf [file JCI0627352sd.pdf]

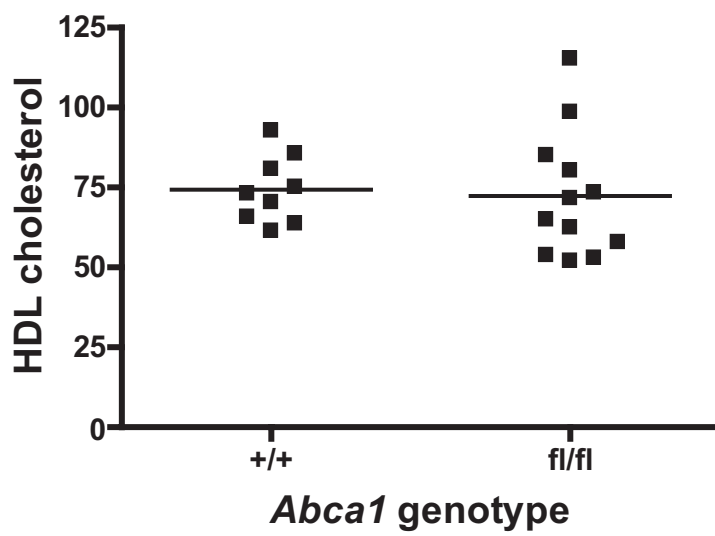

Supplemental Figure 1

Plasma HDL cholesterol levels in mice with wildtype (+/+) or floxed (fl/fl) *Abca1* alleles.
